# Supplementary material for: Superior efficacy of co-treatment with dual PI3K/mTOR inhibitor NVP-BEZ235 and pan-histone deacetylase inhibitor against human pancreatic cancer
Source: PubMed Central journal article supplement (PMC3717802; doi:10.18632/oncotarget.724), 2012-11-15
Supplement: oncotarget-03-1416-s001.pdf [file oncotarget-03-1416-s001.pdf]

## Superior efficacy of co-treatment with dual PI3K/mTOR inhibitor NVP-BEZ235 and pan-histone deacetylase inhibitor against human pancreatic cancer - Venkannagiri et al

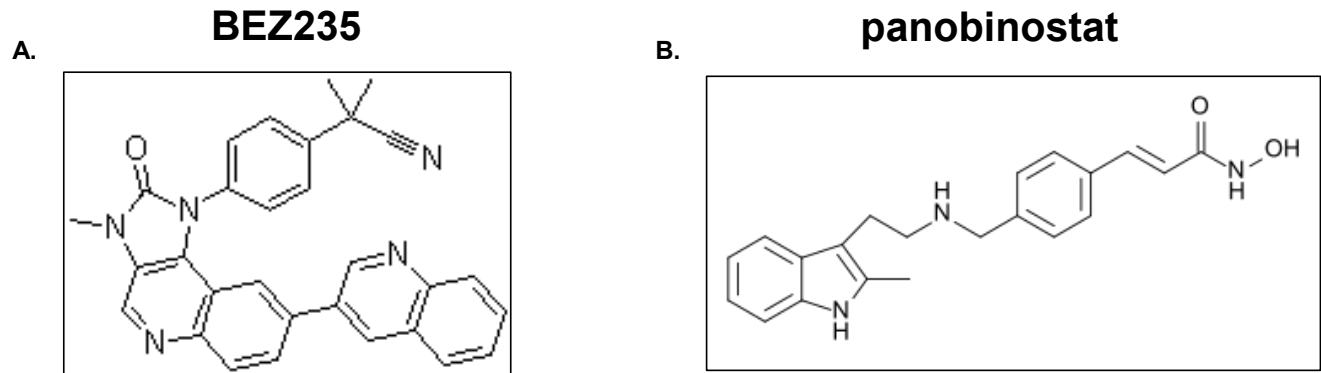

Supplemental Figure S1: Chemical structures for BEZ235 and panobinostat.

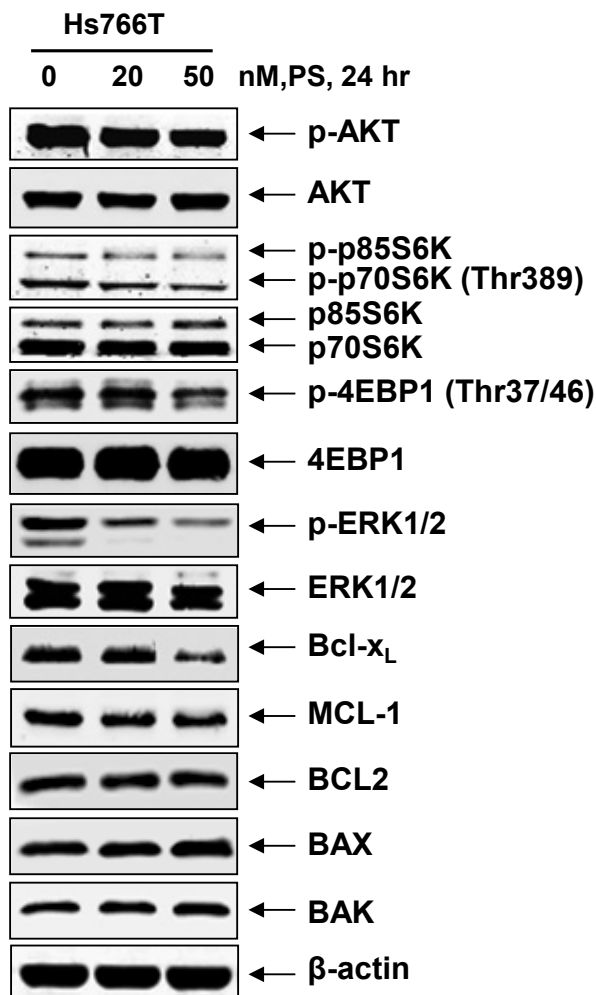

**Supplemental Figure S2: Effects of treatment with PS on mTOR signaling and BCL2 family proteins in pancreatic cancer cells.** Hs766T cells were treated with the indicated concentrations of PS for 24 hours. After treatment, total cell lysates were prepared and immunoblot analyses were performed for p-AKT (S473), AKT, p-p70S6K, p70S6K, p-4EBP1, 4EBP1, p-ERK1/2, ERK1/2, Bcl-x<sub>L</sub>, MCL-1, BCL2, BAX, and BAK. The expression levels of β-actin in the lysates served as the loading control.
